# Supplementary material
Source: PubMed Central journal article supplement (PMC8157157)

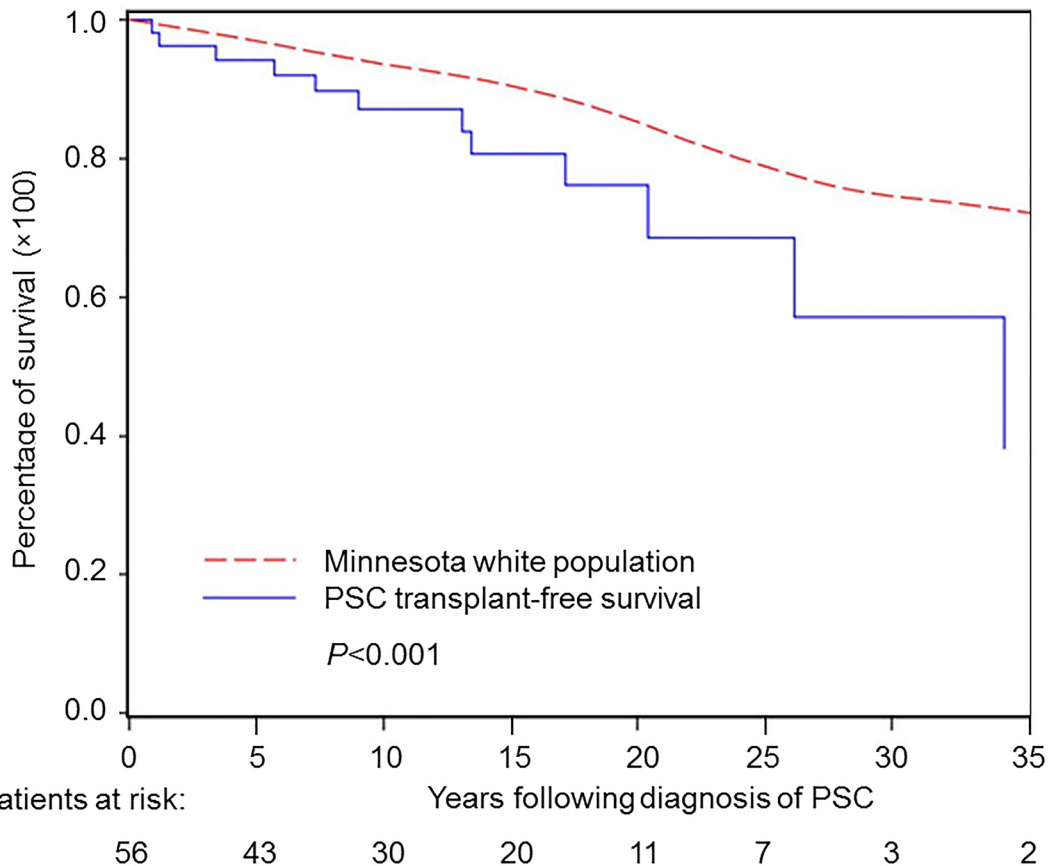

Supplement: NIHMS1696502-supplement-Suppl_Figure.pdf [file NIHMS1696502-supplement-Suppl_Figure.pdf]
